# Supplementary material for: A Scoping Review of Galectin-3 as a Biomarker of Cardiovascular Diseases in Pediatric Populations
Source: MDPI journal article supplement (doi:10.3390/ijerph19074349), 2022-04-05
Supplement: s1 [file s1]

Supplementary Table S1

| Reference<br><i>Publication</i><br><i>year/</i><br>[Reference<br>number] | Study group<br>(Number of<br>patients)<br>C-children<br>A-adults,<br>Age<br>(R - Range<br>M- Median) | Control group:<br>Yes/No<br>(Number of<br>individuals)<br>C-children<br>A-adults | Study design                     | Heart diseases in<br>study groups                              |
|--------------------------------------------------------------------------|------------------------------------------------------------------------------------------------------|----------------------------------------------------------------------------------|----------------------------------|----------------------------------------------------------------|
| Mohammed et<br>al. 2014/[20]                                             | C(60)<br>R:5-36 mo.<br>M: 16 mo.                                                                     | Yes<br>C (30)                                                                    | prospective                      | ASD<br>VSD<br>AVSD<br>PDA<br>Other congenital<br>heart defects |
| Numano F et<br>al. 2015/[24]                                             | (144)<br>C (63)<br>R: 10-69 mo.<br>M: 35,4 mo.<br>A (81)<br>R: no data<br>M: no data                 | Yes<br>C (7)<br>A (68)                                                           | prospective                      | Kawasaki Disease                                               |
| Kotby et al.<br>2016/[19]                                                | C(45)<br>R:2 mo–15 y.<br>M: 9 y.                                                                     | Yes<br>C (45)                                                                    | Prospective, cross-<br>sectional | DCM<br>CHD<br>RHD                                              |
| Woulfe KC et<br>al. 2017/[23]                                            | (52)<br>C (42)<br>R:0,05 – 17,7 y.<br>M: 4 y.<br>A(10)<br>R: 20-60 y.<br>M: 51 y.                    | Yes<br>C (22)<br>A (10)                                                          | prospective                      | IDC                                                            |
| Frank BS et al<br>2018./[28]                                             | C(27)<br>R: 2 d.-12 y.<br>M: 0,7 y.                                                                  | No                                                                               | Prospective, cohort<br>study     | CoA before and<br>after repair.                                |
| Zegelbone et<br>al.<br>2019/[29]                                         | C(16)<br>R:12-57 y.<br>M:15,5 y.                                                                     | No                                                                               | prospective                      | TOF after repair                                               |
| Elhewala et al.<br>2020/[22]                                             | C (40)<br>R: 6-36 mo.<br>M: 15,48 mo.                                                                | Yes<br>C(20)                                                                     | prospective                      | CHD                                                            |

|                               |                                                                                                                                                    |               |                               |                                                         |  |
|-------------------------------|----------------------------------------------------------------------------------------------------------------------------------------------------|---------------|-------------------------------|---------------------------------------------------------|--|
|                               | C(145)<br>(13 neonates, 52<br>infants,<br>80 older children)                                                                                       |               |                               |                                                         |  |
| Parker et al.<br>2020/[25]    | *no mortality or<br>readmission group<br>R: 5,2-80,6 mo.<br>M: 34,8 mo.<br><br>*readmission or<br>mortality group<br>R: 4,1-48,7 mo.<br>M: 7,4 mo. | No            | Prospective, cohort<br>study  | VSD<br>AVSD<br>PVR                                      |  |
| Saleh et al.<br>2020/[21]     | C (75)<br><br>R: 0,6-9,3 y.<br>M: 3,7 y.                                                                                                           | Yes<br>C (40) | Prospective, cohort<br>study  | ASD<br>VSD<br>PDA<br>ASD+VSD<br>PS<br>CMR<br>TGA<br>TOF |  |
| Parsons et al.<br>2020/[27]   | C (162)<br>R: 0-18 y.<br>M: 4,05 y.                                                                                                                | No            | Prospective,<br>observational | CHD                                                     |  |
| Greenberg et<br>al. 2021/[26] | C(395)<br><br>R: 1 mo. – 18 y.<br>M: no data                                                                                                       | No            | Prospective, cohort<br>study  | CHD                                                     |  |
| Pietrzak et al.<br>2021/[31]  | C (25)<br><br>R: 11-17 y.<br>M: 14,3 y.                                                                                                            | C (21)        | prospective                   | Ventricular<br>arrhythmia                               |  |
| Bosch et al.<br>2021/[30]     | C (133)<br><br>R: 10,4-15,9y.<br>M: 13,2 y.                                                                                                        | No            | Prospective,<br>multicenter   | HLHS<br>TA<br>PA<br>DILV<br>DORV                        |  |
